# Supplementary material for: Efficient Differentiation of Mouse Induced Pluripotent Stem Cells into Alveolar Epithelium Type II with a BRD4 Inhibitor
Source: Hindawi journal article supplement (doi:10.1155/2019/1271682), 2019-12-27

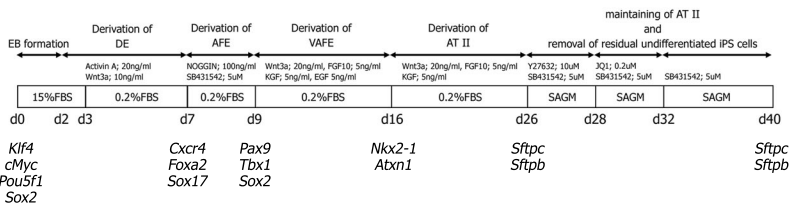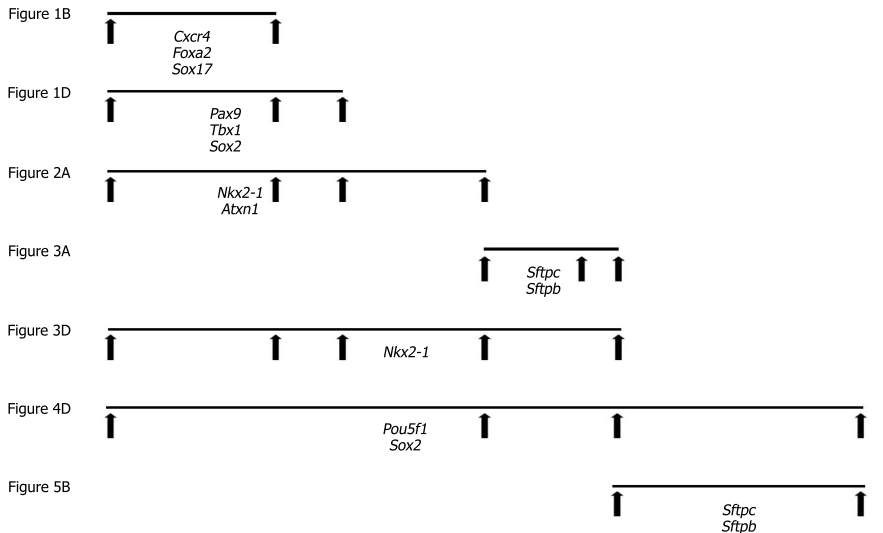

Supplement: f1 [file 1271682.f1.pdf]
